# Supplementary material for: Impact of microwave power on the preparation of silver nanowires via a microwave-assisted method
Source: Royal Society of Chemistry journal article supplement (doi:10.1039/c3ra00117b), 2013-01-01
Supplement: c3ra00117b.pdf [file c3ra00117b.pdf]

### Supplementary materials

| Microwave power (W) | Working time (seconds) | Stand-by time (seconds) | Ratio of working time at per cycle |
|---------------------|------------------------|-------------------------|------------------------------------|
| 80 (minimum)        | 3                      | 27                      | 10%                                |
| 160                 | 6                      | 24                      | 20%                                |
| 320                 | 13                     | 20                      | 40%                                |
| 560                 | 23                     | 10                      | 70%                                |
| 800 (maximum)       | Always                 | 0                       | 100%                               |

Table S1. Working conditions of applied microwave powers. The oven works at cyclic method.

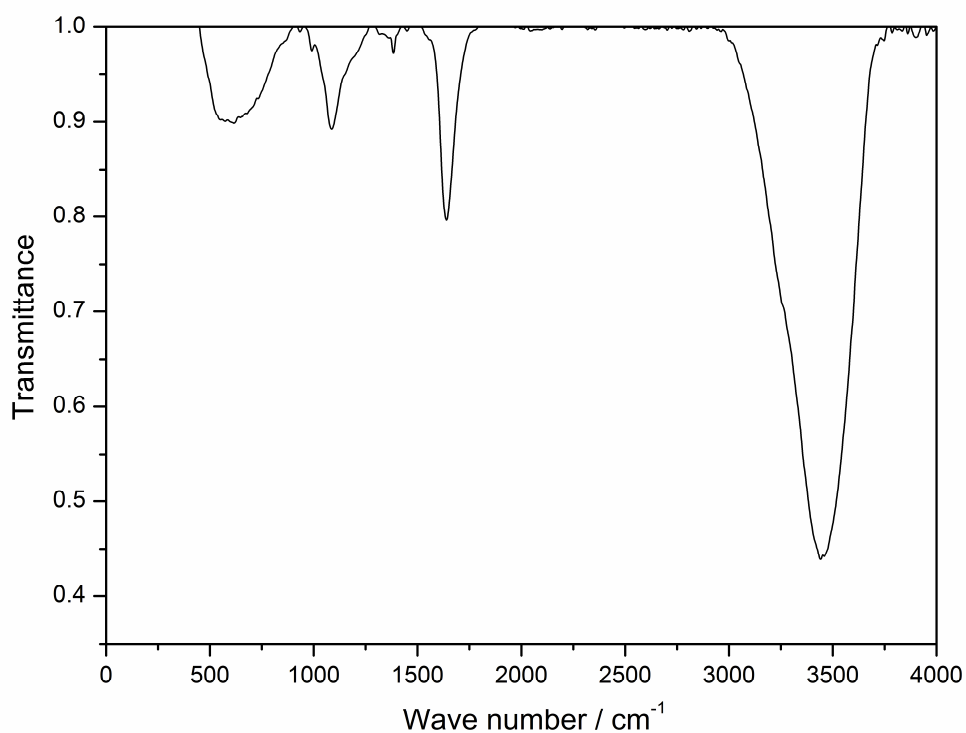

Figure S1. IR spectrum of washed nanowires obtained at 800 W × 0.5 min + 320 W × 2.5 min.

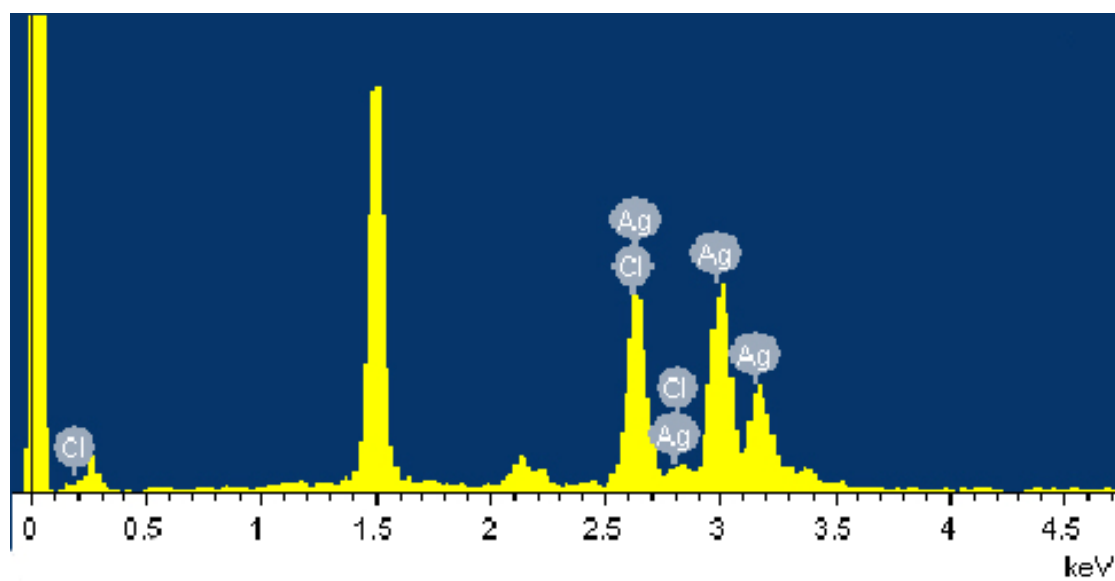

Figure S2. EDS confirmation of AgCl colloids obtained at 800W × 0.5min.

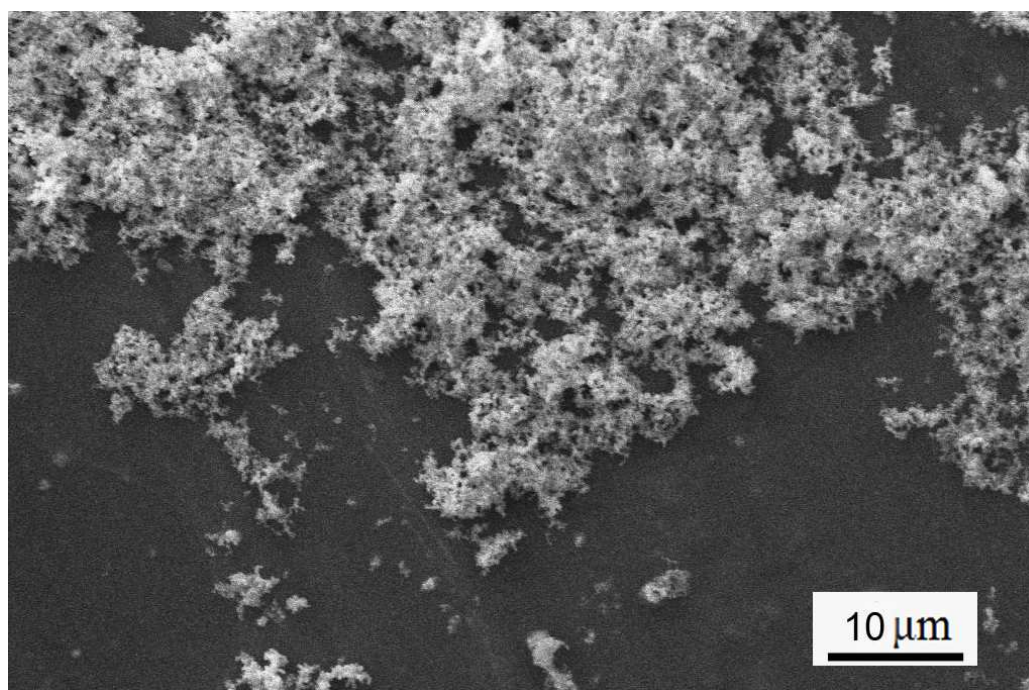

Figure S3. SEM image of AgCl colloids obtained at freshly-prepared reaction solution. The colloids showed a conjunctive structure.
